# Supplementary material for: Leishmania amazonensis Engages CD36 to Drive Parasitophorous Vacuole Maturation
Source: PubMed Central journal article supplement (PMC4900624; doi:10.1371/journal.ppat.1005669), 2016-06-09
Supplement: ppat.1005669.s007.pdf [file ppat.1005669.s007.pdf]

S6 Table. Fly lines used in the screening for factors related to *Leishmania* infection.

| Gene ID | Gene Name                            | Fly stock or genotype                              |
|---------|--------------------------------------|----------------------------------------------------|
| CG4059  | ftz transcription factor 1           | VDRC v2959                                         |
| CG8556  | Rac2                                 | VDRC v50349                                        |
| CG6699  | $\beta$ '-coatomer protein           | VDRC v42071                                        |
| CG10345 | CG10345                              | VDRC v51537/100252                                 |
| CG4280  | croquemort                           | VRDC v45883                                        |
| CG31741 | CG31741                              | VDRC v7930                                         |
| CG31962 | Scavenger receptor class C, type III | VDRC v13032                                        |
| CG3212  | Scavenger receptor class C, type IV  | VRDC v1330                                         |
| CG16880 | Nimrod C3                            | VDRC v 22921                                       |
| CG1887  | debris buster                        | VRDC v4100                                         |
| CG2736  | CG2736                               | VRDC v10272                                        |
| CG7228  | peste                                | VRDC v31155                                        |
| CG2727  | epithelial membrane protein          | VRDC v12233                                        |
| CG7227  | CG7227                               | VDRC v28612/108059                                 |
| CG12789 | santa-maria                          | VDRC v33153                                        |
| CG7000  | Sensory neuron membrane protein 1    | VDRC v42496                                        |
| CG3829  | CG3829                               | VDRC v103492/103492                                |
| CG8856  | Scavenger receptor class C, type II  | VDRC v51504/100928                                 |
| CG42282 | Nimrod A                             | VDRC v39048                                        |
| CG33119 | Nimrod B1                            | VDRC v19049                                        |
| CG31839 | Nimrod B2                            | VDRC v105925                                       |
| CG16873 | Nimrod B5                            | VRDC v15758                                        |
| CG8942  | Nimrod C1                            | Trip 25787                                         |
| CG18146 | Nimrod C2                            | VDRC v9976/Trip 25960                              |
| CG16876 | Nimrod C4                            | VDRC v36260                                        |
| CG6124  | eater                                | VDRC v4301/Trip 25863                              |
| CG7447  | slowdown                             | VDRC v106464                                       |
| CG4845  | phagocyte signaling impaired         | VDRC v21960                                        |
| CG4636  | SCAR                                 | VRDC v21908/                                       |
| CG3664  | Rab5                                 | VRDC v103945                                       |
| CG2086  | draper                               | w;sp/cyo; <i>drpr</i> $\Delta$ 5(tcc9)/Tm6,sd,Tb,c |
| CG4280  | croquemort                           | <i>crg</i> <sup>-/-</sup>                          |
|         |                                      | w; UAS- <i>Bax</i> /Cyo-Act GFP                    |
|         |                                      | w; <i>hml</i> $\Delta$ GAL4, UAS-GFP               |
